# Supplementary material
Source: PubMed Central journal article supplement (PMC1780088)
Supplement: cmaj_176_3_333__1.pdf [file cmaj_176_3_333__1.pdf]

**Appendix 1:** Temporal distribution of hospital admission for acute myocardial infarction, by number (%) of patients, according to sex and use of statins

| Period,<br>hospital's<br>fiscal year | Women                         |                           | Men                            |                           | Total<br><i>n</i> = 38 543 |
|--------------------------------------|-------------------------------|---------------------------|--------------------------------|---------------------------|----------------------------|
|                                      | Non-users<br><i>n</i> = 9 405 | Users<br><i>n</i> = 5 323 | Non-users<br><i>n</i> = 14 428 | Users<br><i>n</i> = 9 387 |                            |
| 1998/99                              | 1881 (20)                     | 532 (10)                  | 3 174 (22)                     | 845 (9)                   | 6 552 (17)                 |
| 1999/2000                            | 1693 (18)                     | 585 (11)                  | 2 741 (19)                     | 1 220 (13)                | 6 167 (16)                 |
| 2000/01                              | 1599 (17)                     | 798 (15)                  | 2 453 (17)                     | 1 502 (16)                | 6 552 (17)                 |
| 2001/02                              | 1505 (16)                     | 958 (18)                  | 2 309 (16)                     | 1 690 (18)                | 6 552 (17)                 |
| 2002/03                              | 1 317 (14)                    | 1 118 (21)                | 1 876 (13)                     | 1 971 (21)                | 6 167 (16)                 |
| 2003/04                              | 1 317 (14)                    | 1 277 (24)                | 1 876 (13)                     | 2 159 (23)                | 6 552 (17)                 |
